# Supplementary material
Source: publisher figshare collection journal article supplement (https://acs.figshare.com/ndownloader/files/4863094)
Supplement: Supplementary file 1 [file 4863094]

## Feasibility of using 2,3,3,3-tetrafluoropropene (R1234yf) as a solvent for solid-liquid extraction of biopharmaceuticals

John Suberu,<sup>1</sup> Peyman Yamin,<sup>1</sup> Robert Cornell,<sup>2</sup> Arya Sam,<sup>1</sup> Alexei Lapkin<sup>1,1</sup>

<sup>1</sup>*Department of Chemical Engineering and Biotechnology, University of Cambridge,  
Cambridge CB2 3RA, United Kingdom*

<sup>2</sup> *Department of Materials Science and Metallurgy, University of Cambridge,  
Cambridge CB3 0FS, United Kingdom*

### Electronic Supporting Information

#### 1. Energy graphs

Table S1 shows the data used in the plot of the energy graphs, Figure 4.

Table S1. Data for energy graphs

| (kcal/mol)         | E misfit | E H-bonding | E VdW     | H total   | $\mu$ mix | $\ln \gamma$ |
|--------------------|----------|-------------|-----------|-----------|-----------|--------------|
| tetrafluoroethane  | 3.19186  | -0.85635    | -10.00739 | -7.67183  | -5.13526  | -2.29601555  |
| propanone          | 5.66174  | -0.08433    | -12.29371 | -6.71622  | -4.06840  | -0.46366906  |
| tetrafluoropropene | 3.19456  | -0.42565    | -10.44859 | -7.67962  | -3.69730  | 0.17369733   |
| toluene            | 3.89751  | 0.00000     | -12.72758 | -8.83001  | -3.50890  | 0.49728391   |
| water              | 4.36574  | -4.55268    | -10.40504 | -10.59193 | 0.95658   | 8.16678235   |

---

<sup>1</sup> Corresponding Author: A. Lapkin, Email: [aal35@cam.ac.uk](mailto:aal35@cam.ac.uk); Fax: +44 1223 334796.
